# Supplementary material for: Phthalocyanines: An Old Dog Can Still Have New (Photo)Tricks!
Source: MDPI journal article supplement (doi:10.3390/molecules26092823), 2021-05-10
Supplement: s1 [file s1]

# Phthalocyanines: An Old Dog Can Still Have New (Photo)Tricks!

Andrea M. Schmidt <sup>1</sup> and Mário J. F. Calvete <sup>2,\*</sup>

<sup>1</sup> LifeEstetika, Laser Solutions, Universitätsstadt Tübingen, Maria-von-Linden Strasse, 72076 Tübingen, Germany; andrea.m.schmidt.dls@gmail.com

<sup>2</sup> University of Coimbra, CQC, Department of Chemistry, Rua Larga, 3004-535 Coimbra, Portugal

\* Correspondence: mcalvete@qui.uc.pt

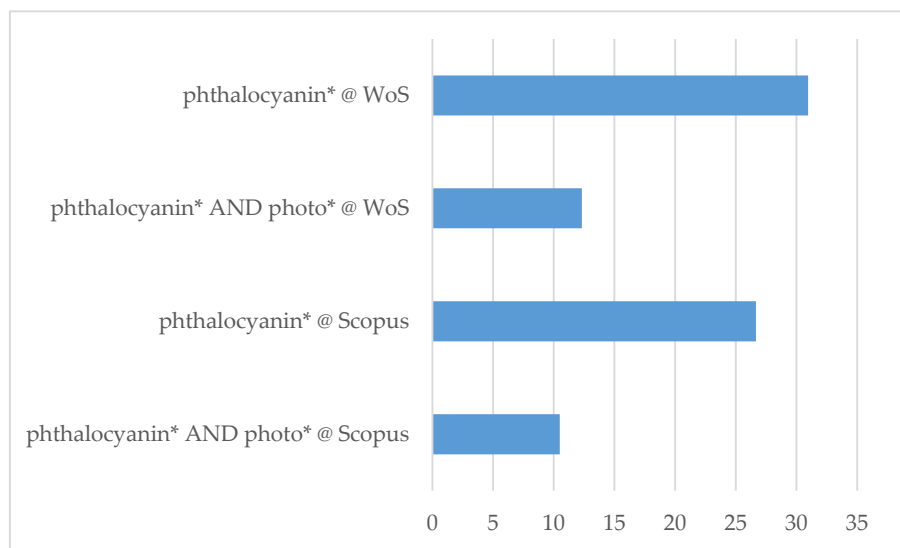

**Figure S1.** Results obtained using search strings (phthalocyanin\*) and (phthalocyanin\* AND photo\*) present in the title and/or abstract and/or keywords in search engines Scopus® and Web of Science® (WoS). Results are in thousands.

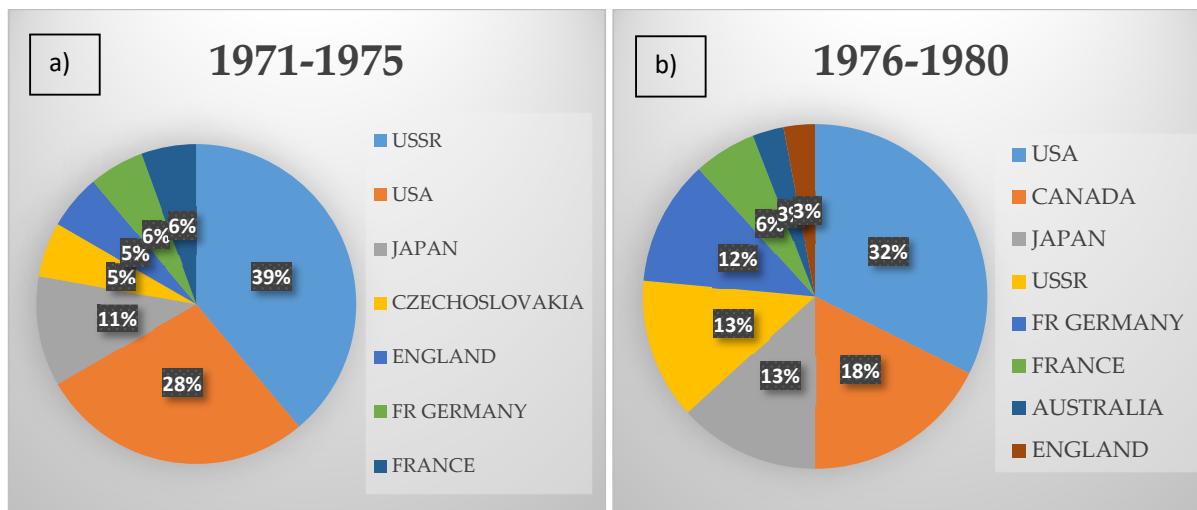

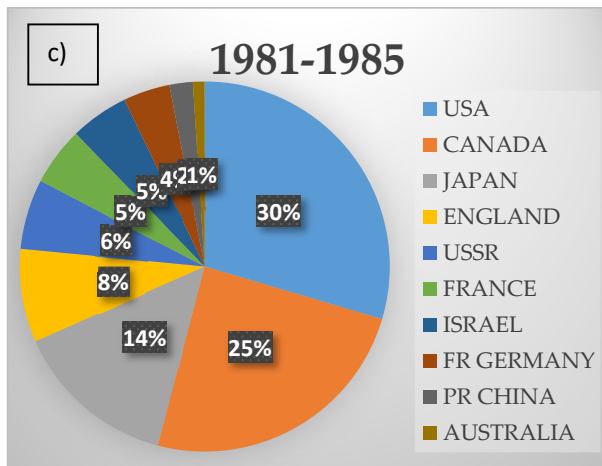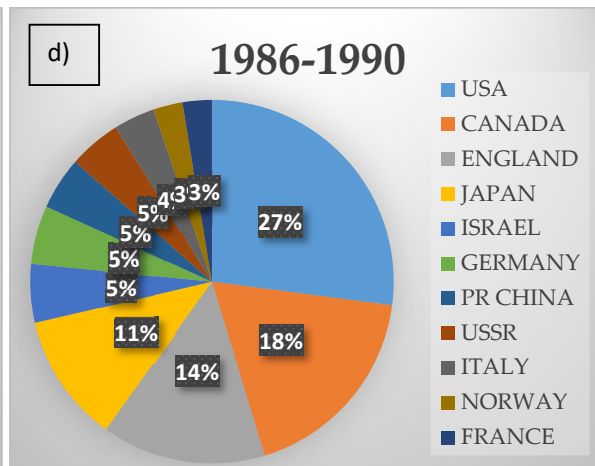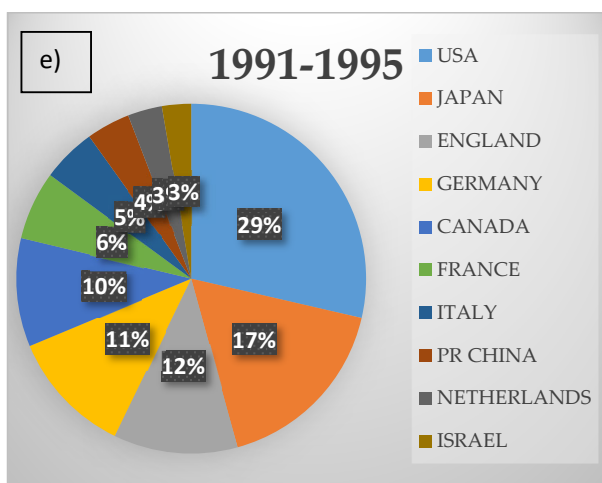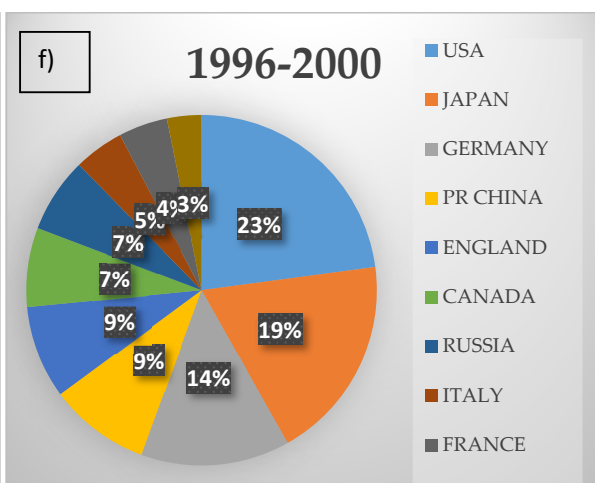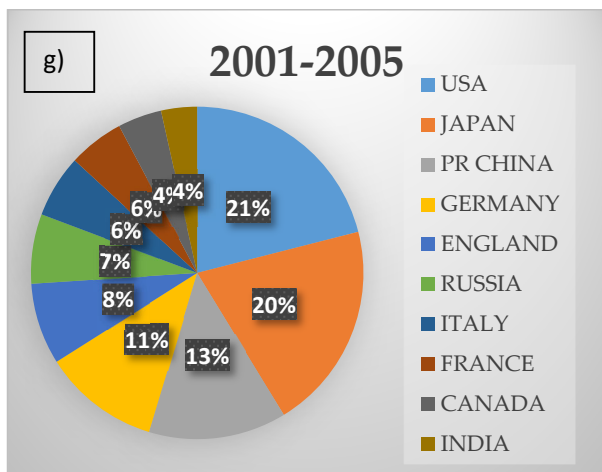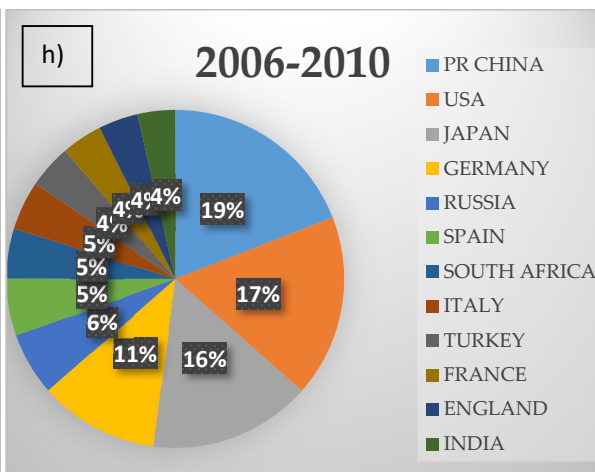

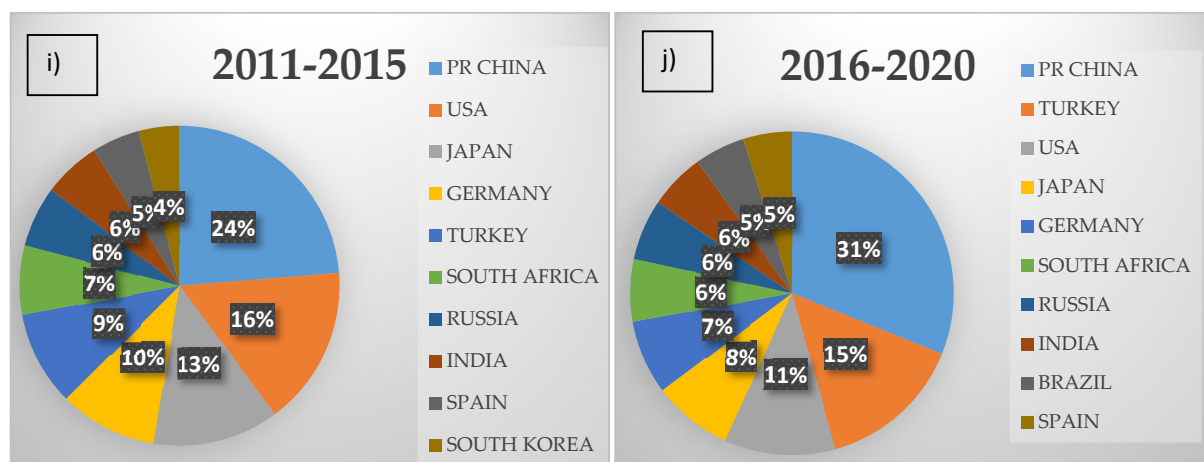

**Figure S2.** Country weight in publication of articles by 5-year span, from 1971 to 2020. Articles were found by using search string “phthalocyanin\*” followed by refining with term “photo\*”. a) 1971-1975; b) 1976-1980; c) 1981-1985; d) 1986-1990; e) 1991-1995; f) 1996-2000; g) 2001-2005; h) 2006-2010; i) 2011-2015; j) 2016-2020.
